# Supplementary material
Source: Research Square preprint supplement (doi:10.21203/rs.3.rs-9247823/v1)
Supplement: Supplementary file 1 [file 353fd9be84c16396bfa325a0.docx]

**Supplementary Materials**

| **Modality** | **n** | **Patient population** | **Primary outcome** | **Age**  **mean, sd** | **Sex** |
| --- | --- | --- | --- | --- | --- |
| TMS | 14 (139 stimulation sites) | Healthy participants | Heart rate deceleration as measured using heart-brain coupling | 36.4 (14.7) | 60% M, 40% F |
| DBS | 58 (392 stimulation sites) | Mild Alzheimer’s disease | Multiple categorical autonomic symptoms | 68.5 (7.9) | 55% M, 45% F |
| TFUS | 23 (46 stimulation sites) | Healthy participants | Heart rate variability as measured using standard deviation of normal sinus beats | 27 (5.5) | 30% M, 70% F |

**Supplementary Table 1:** The convergent sympathetic arousal circuit was derived from three datasets that used different neuromodulation methods and measured transient changes in different autonomic arousal outcomes.

**
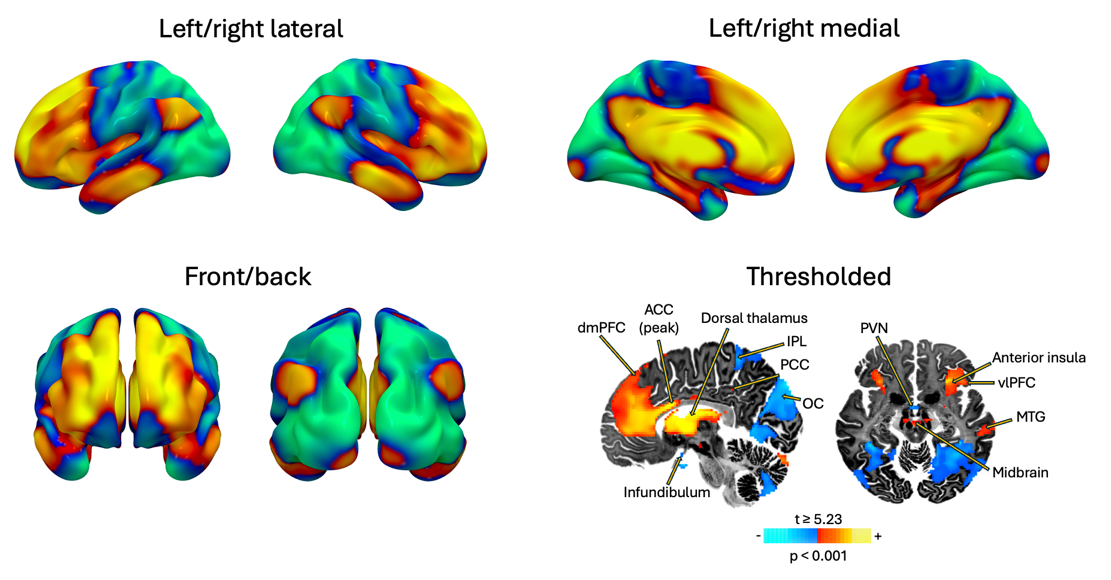
**

**Supplementary Figure 1:** Convergent sympathetic arousal circuit

**
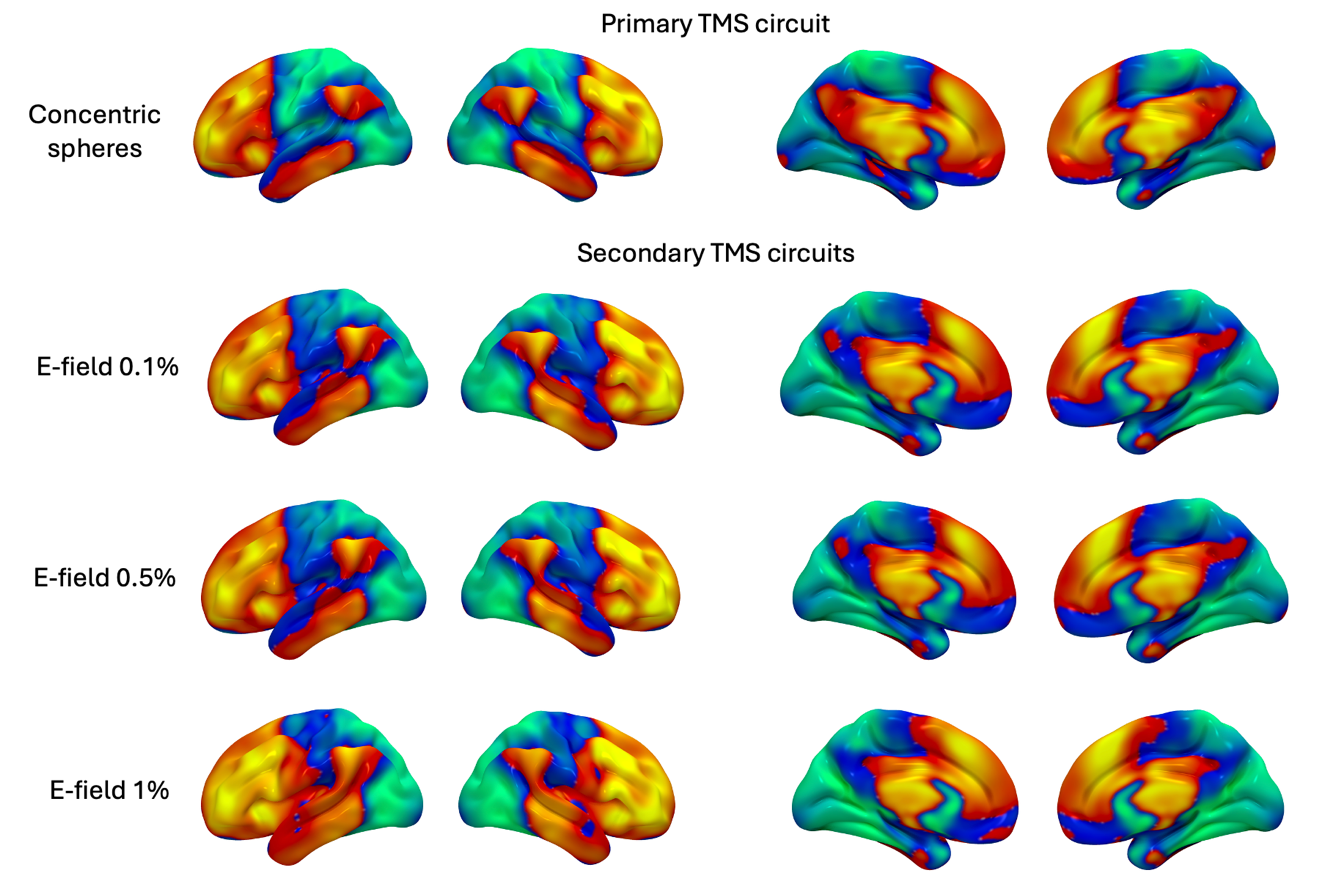
**

**Supplementary Figure 2:** TMS circuit variations


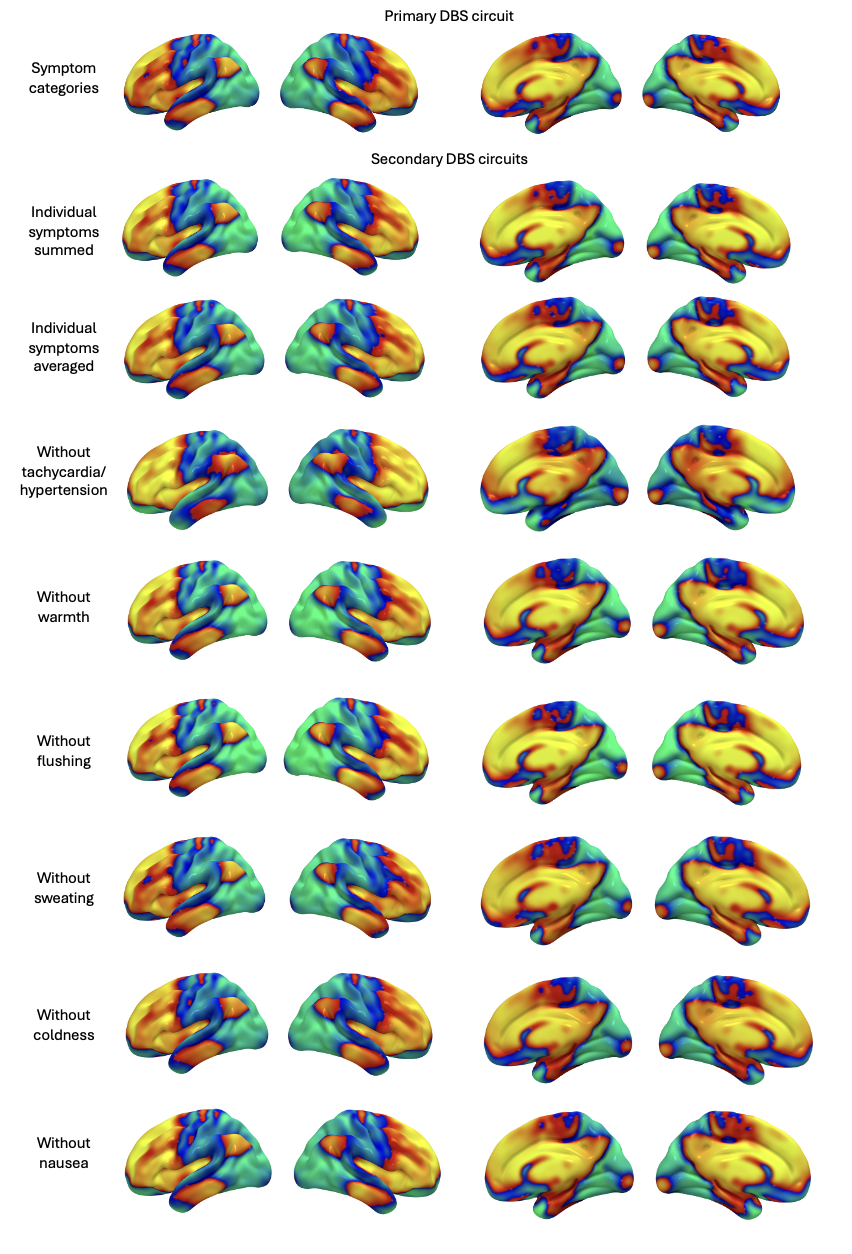


**Supplementary Figure 3:** DBS circuit variations


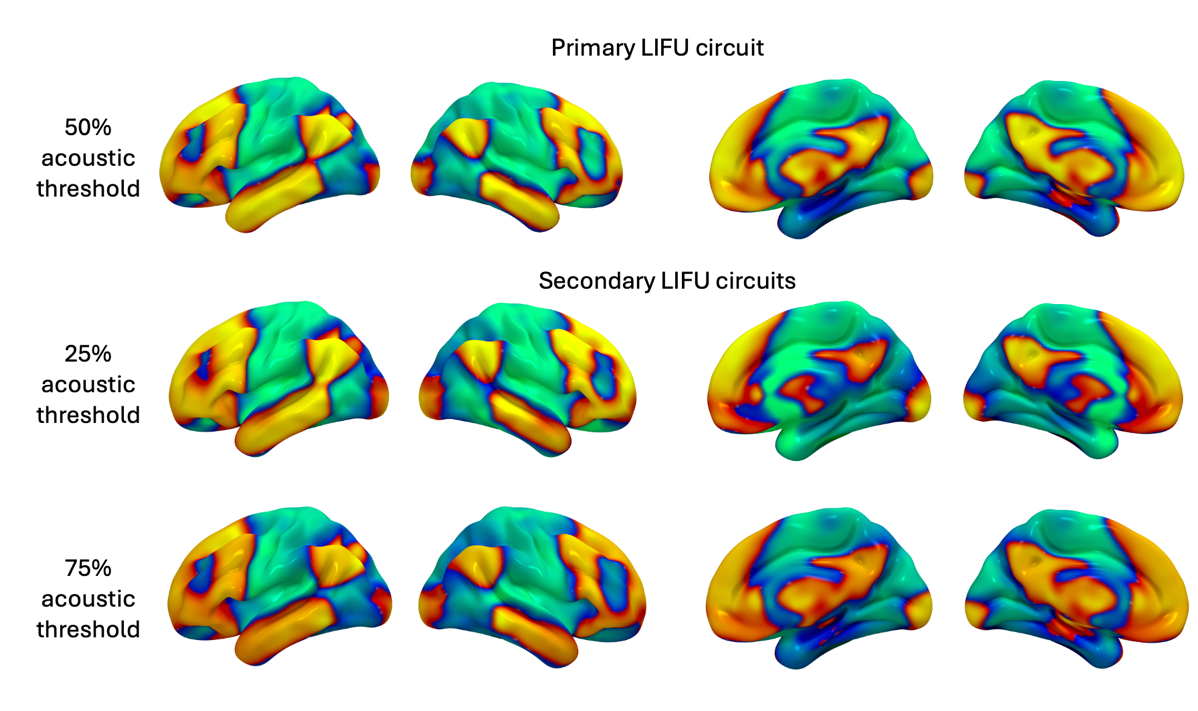


**Supplementary Figure 4:** LIFU circuit variations


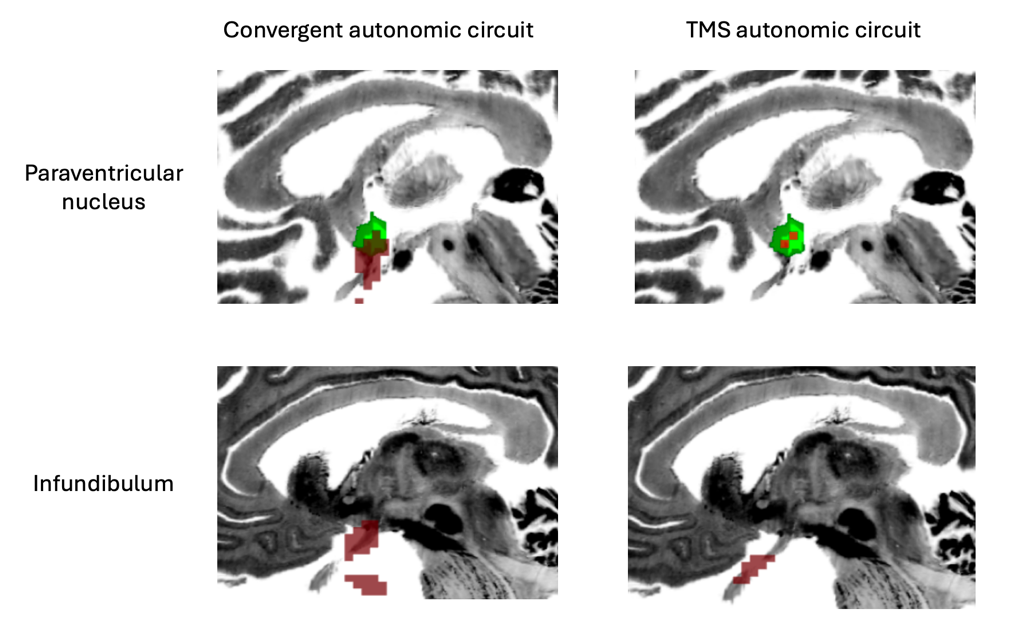


**Supplementary Figure 5:** The paraventricular nucleus of the hypothalamus is depicted in green. Significant convergent autonomic circuit (top left pane) and TMS autonomic circuit (top right pane) paraventricular nucleus locations are depicted in red. Significant infundibulum circuit locations are shown in the bottom panes.
